# Supplementary material
Source: publisher figshare collection journal article supplement (https://frontiersin.figshare.com/ndownloader/files/13105724)
Supplement: Supplementary file [file 13105724]

## **NsrR1, a Nitrogen Stress-Repressed sRNA, Contributes to the Regulation of *nblA* in *Nostoc* sp. PCC 7120**

**Isidro Álvarez-Escribano, Agustín Vioque\*, Alicia M. Muro-Pastor**

*Instituto de Bioquímica Vegetal y Fotosíntesis, Consejo Superior de Investigaciones Científicas and Universidad de Sevilla, Sevilla, Spain*

### **\*Correspondence:**

Dr. Agustín Vioque, Instituto de Bioquímica Vegetal y Fotosíntesis, Consejo Superior de Investigaciones Científicas and Universidad de Sevilla, Avda. Américo Vespucio 49, Sevilla, 41092, Spain  
vioque@us.es

### **Keywords:**

Regulatory RNA, cyanobacteria, NtcA, feed-forward loop, post-transcriptional regulation

**Running title:** sRNA regulation of *nblA*

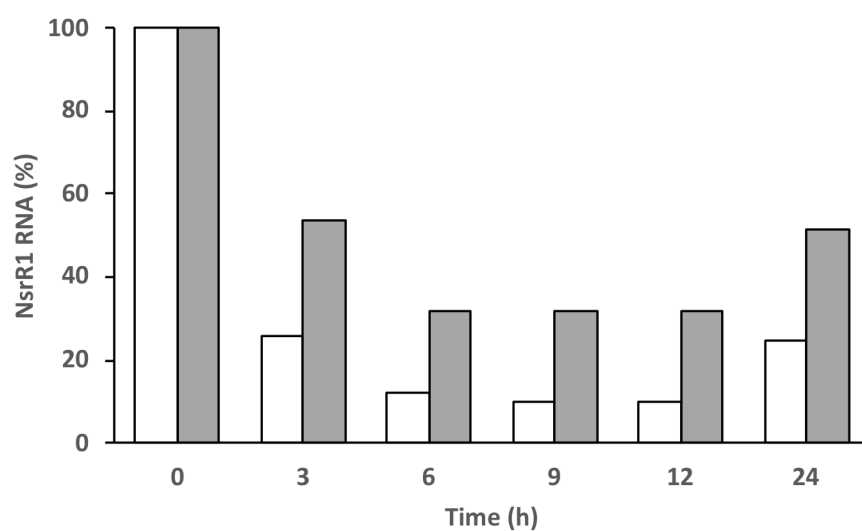

**Figure S1. Quantification of NsrR1 expression.** The signal corresponding to NsrR1 in the Northern blot shown in Fig. 2A for the wild type strain (white) or the *ntcA* strain (grey) were quantified and normalized to the amount of 5S RNA in each lane. NsrR1 amount is expressed as percentage of the amount present at time 0 in each strain.

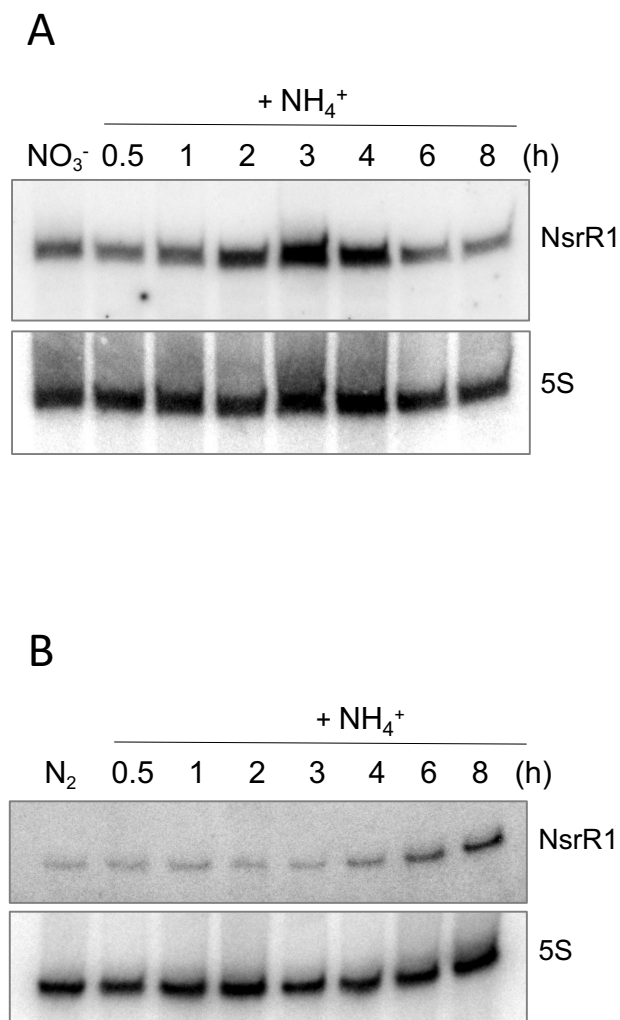

**Figure S2. Expression of NsrR1 upon addition of ammonium.** Expression was analyzed in cultures of *Nostoc* sp. PCC 7120 growing at the expense of nitrate (**A**) or  $\text{N}_2$  (**B**) to which 10 mM  $\text{NH}_4^+$  was added. RNAs were extracted at the indicated times (h) after addition of  $\text{NH}_4^+$ . Upper panels show hybridization to the NsrR1 probe. Lower panels show hybridization to a probe for 5S RNA used as loading and transfer control.

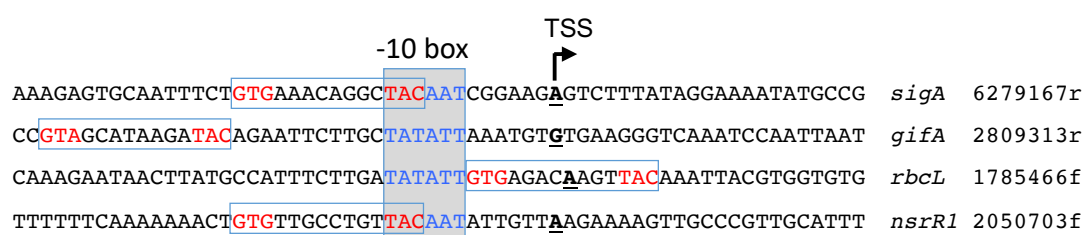

**Figure S3. NtcA binding sites on NtcA repressed promoters.** The promoter of *nsrR1* is shown together with the NtcA-repressed promoters of *sigA* (Muro-Pastor et al., 2017), *gifA* (Galmozzi et al., 2010) and *rbcL* (Ramasubramanian et al., 1994). Promoters were aligned by the -10 promoter element (grey box). The TSS (Mitschke et al., 2011) are highlighted in bold and underlined. The NtcA binding sites are framed.

## Supplementary figures and text

## sRNA regulation of *nblA*

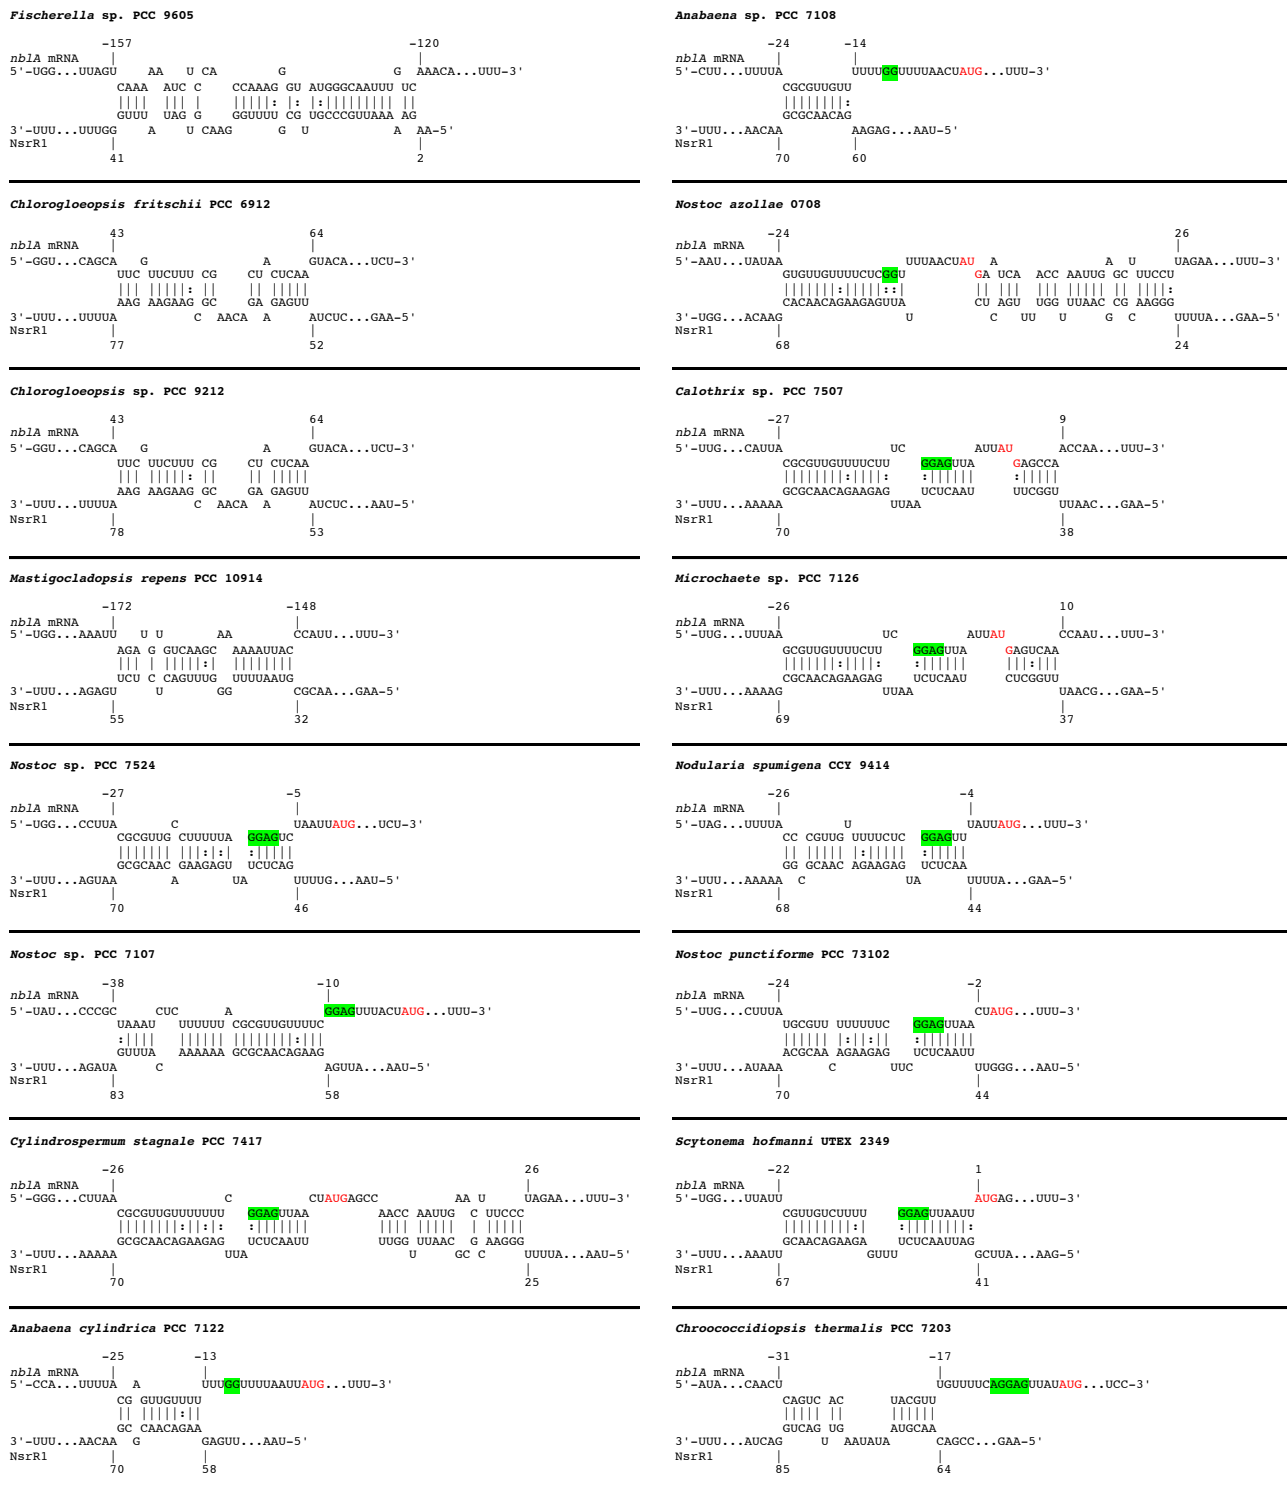

**Figure S4. Conservation of the predicted interaction between the *nblA* mRNA and NsrR1 in cyanobacteria.** Potential interaction between NsrR1 and *nblA* mRNA (analyzed from 200 nucleotides upstream of the start codon to the stop codon of the NblA coding sequence) was computed for each cyanobacteria shown in Fig. 1 using IntaRNA software (Mann et al., 2017). Nucleotide positions in the *nblA* mRNA are numbered from first nucleotide of the coding sequence, negative upstream to positive downstream. AUG start codons (red) and putative Shine-Dalgarno sequences (green shading) are indicated. Only those strains with a predicted stable interaction are shown.

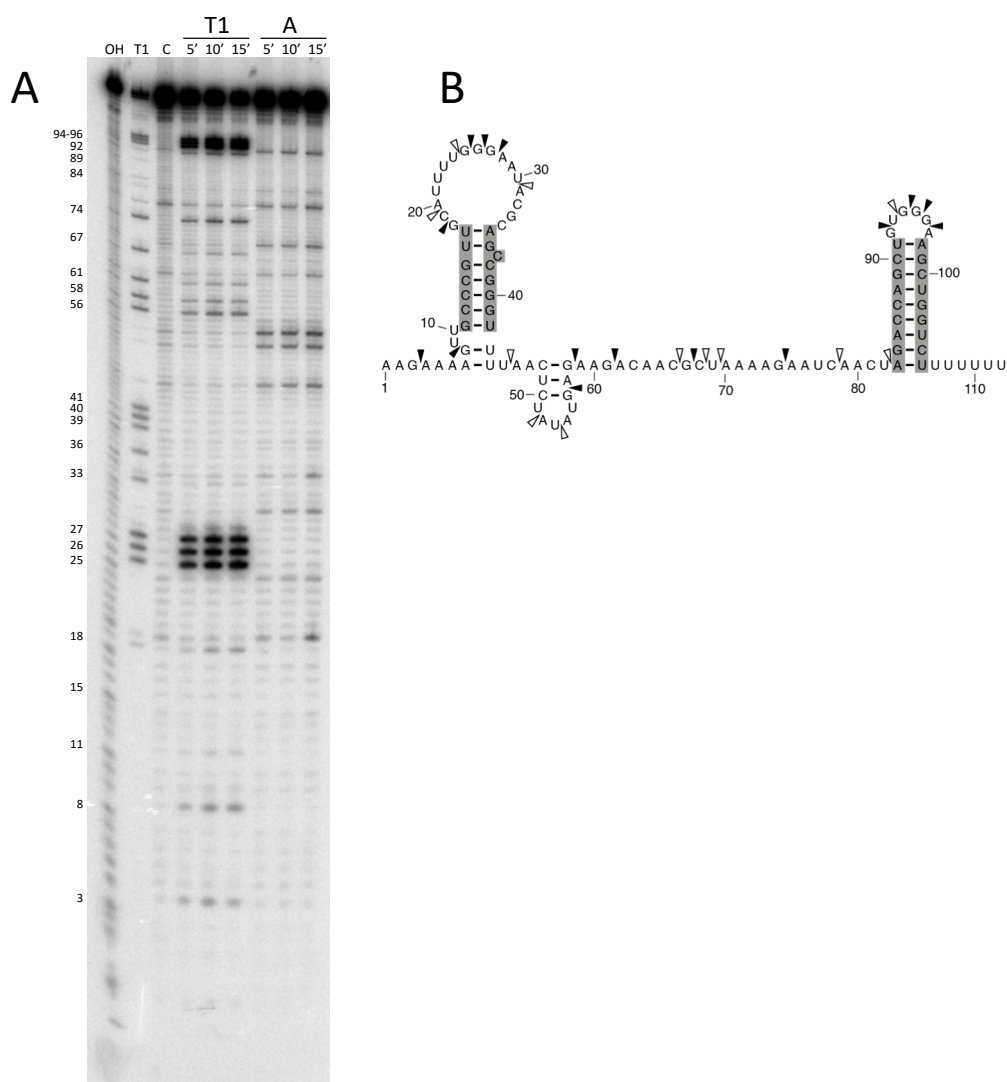

**Figure S5. Structure probing of NsrR1.** (A) 5'-end labelled NsrR1 was incubated with RNase T1 (1 mU/ml) or RNase A (1 mU/ml) for 5, 10 or 15 minutes and the resulting fragments analyzed on a 8% polyacrilamide sequencing gel. C, untreated control; OH, alkaline ladder; T1, RNase T1 ladder. Nucleotide positions of NsrR1 are shown on the left. (B) Secondary structure model of NsrR1. Black and white triangles indicate the positions sensitive to hydrolysis by RNase T1 and RNase A, respectively. The shaded areas highlight the nucleotides more resistant to lead(II)-induced hydrolysis (Figure 4).

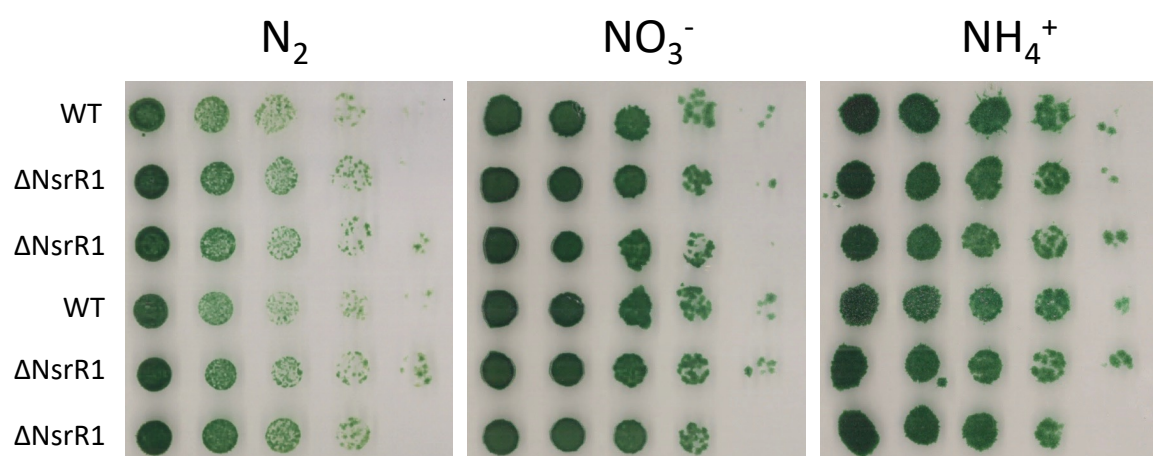

**Figure S6. Growth properties of  $\Delta nsrR1$  strains.** Cells were grown in the presence of nitrate, resuspended in BG11<sub>0</sub> at an  $OD_{750} = 0.3$ . Five-fold serial dilutions of liquid cultures of wild type or 4 different  $\Delta nsrR1$  isolates were prepared and 10  $\mu$ l of each dilution plated on BG11<sub>0</sub> plates lacking nitrogen ( $N_2$ ), or containing nitrate ( $NO_3^-$ ) or ammonium ( $NH_4^+$ ). Pictures were taken after 10 days of incubation at 30°C.

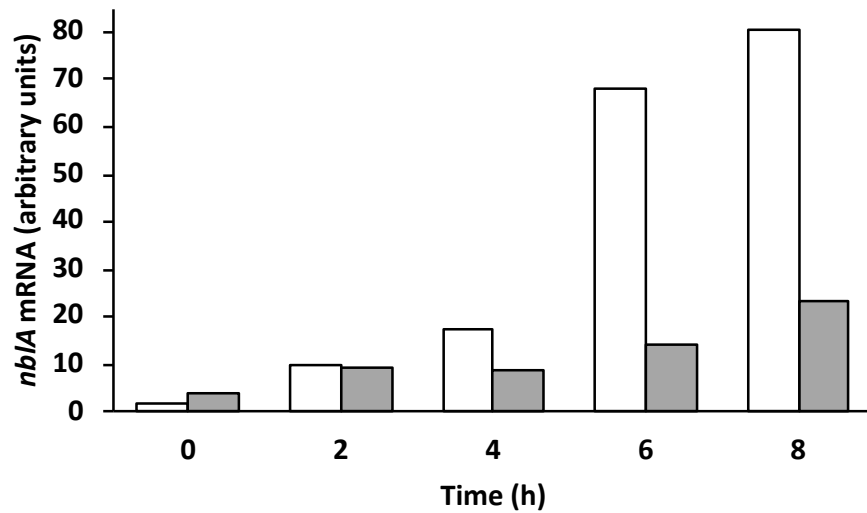

**Figure S7. Quantification of *nblA* mRNA expression.** The signals corresponding to bands 1, 2, and 5 in the Northern blots shown in Fig. 5C for the  $\Delta nsrRI$  strain (white) or the  $\Delta nsrRI + P_{petE}::nsrRI$  strain (grey) were quantified and their total amount normalized to the amount of 5S RNA in each lane. Similar qualitative results were obtained in two other experiments.



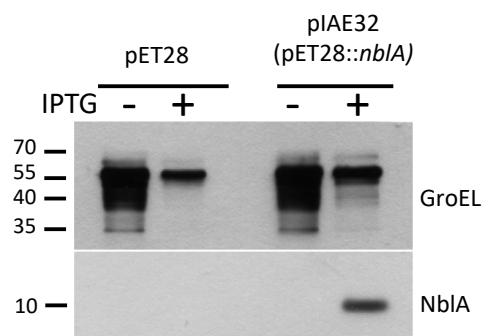

**Figure S8. Detection of NblA in *E. coli* cells using antibodies against NblA.** *E. coli* cells containing vector pET28 or a pET28-derived construct expressing the *nblA* gene were used for Western detection with antibodies generated against purified NblA. Antibodies against GroEL were used as control. Position of protein size markers (kDa) is shown on the left.

**Table S1. Strains**

|                                  | Description                                                                              | Reference                  |
|----------------------------------|------------------------------------------------------------------------------------------|----------------------------|
| <i>Escherichia coli</i>          |                                                                                          |                            |
| DH5 $\alpha$                     | Used for routine transformation                                                          | (Hanahan, 1983)            |
| BL21(DE3)-RIL                    | Cm <sup>R</sup> , used for overexpression of recombinant proteins                        | Agilent Technologies       |
|                                  |                                                                                          |                            |
| <i>Nostoc</i> sp.                |                                                                                          |                            |
| PCC 7120                         | Wild type                                                                                | Pasteur Culture Collection |
| CSE2                             | <i>ntcA</i> null mutant                                                                  | (Frías et al., 1994)       |
| $\Delta nsrRI$                   | <i>nsrRI</i> gene deleted                                                                | This work                  |
| $\Delta nsrRI + P_{petE}::nsrRI$ | <i>nsrRI</i> gene under control of the <i>petE</i> promoter in $\Delta nsrRI$ background | This work                  |

**Table S2. Oligonucleotides**

| Name          | Sequence (5'-3')                                                     | Used for                                                                |
|---------------|----------------------------------------------------------------------|-------------------------------------------------------------------------|
| 153           | GAGTTAAAACCCGGCTGCGTATTCCC                                           | PCR of NsrR1 promoter region (-239 to +50)                              |
| 183           | ATCGATACTCTCGCAACAACG                                                | PCR of NsrR1 promoter region (-239 to +50)                              |
| 418           | CCTGTATGAATATTGTAAAGAAAAGTTGCC                                       | PCR to generate a mutated NtcA binding site in the NsrR1 promoter       |
| 419           | CAATATTACATACAGGCAACACAG                                             |                                                                         |
| 158           | CATCTGCCTCTGCCTCTTCTG                                                | PCR of NsrR1 to generate radioactive probe                              |
| 159           | CCTTCCTTGTAGGCAGTCGAG                                                |                                                                         |
| 170           | <u>GGATCCAACAGACCAACGCTGAG</u>                                       | Deletion of NsrR1                                                       |
| 171           | TAAAACGACTCGAGGTAATCAGCCTCTATC                                       |                                                                         |
| 172           | TGATTACCTCGAGTCGTTTTACGTGGTGTC                                       |                                                                         |
| 173           | <u>GGATCC</u> TAGTCTCACACCATTAGG                                     |                                                                         |
| 184           | <u>CTCGAGACACCACGTAAAACGAC</u>                                       |                                                                         |
| 185           | TAAAATGAAATAAAGAAAAGTTGCCCGTTGC                                      | Cloning of NsrR1 under the promoter of <i>petE</i>                      |
| 186           | GCAACTTTTCTTTATTTTCATTTTAAATAAAATCGACACC                             |                                                                         |
| 299           | GTTTTATCGATGGACTCAGAACACAGTACTC                                      |                                                                         |
| 189 (PLlacOB) | CGCACTGACCGAATTCATTAA                                                | Plasmid backbone amplification from pZE12-luc                           |
| 190 (PLlacOD) | GTGCTCAGTATCTTGTTATCCG                                               |                                                                         |
| 197           | 5' P-AAGAAAAGTTGCCCGTTGC                                             | PCR of NsrR1 for cloning in PZE12-luc                                   |
| 198           | GTTTTTTTCTAGACAGAGACACCACGTAAAACGACT                                 |                                                                         |
| 253           | GTTTTATGCATACAGAGGAATAATCAACAATATGGG                                 | PCR of 5'-UTR of <i>nblA</i> for cloning in pXG10-SF                    |
| 254           | GTTTTGCTAGCGGTGGCAAATGAGCGAATGC                                      |                                                                         |
| 315           | GAAGAAGAACGCTAAAAGAATCAACTAGACC                                      | Mutagenesis of NsrR1 to generate Mut-63                                 |
| 316           | GCGTTCCTCTTCTCATATAGAGTTAAAACCC                                      |                                                                         |
| 317           | GACAAAGGCTAAAAGAATCAACTAGACCAGC                                      | Mutagenesis of NsrR1 to generate Mut-66                                 |
| 318           | CTTTTAGCCCTTGCTTCTCATATAGAGTTAAAACCC                                 |                                                                         |
| 329           | GCGTTCCTCTTTTAGGAGTCTGTTATGAACC                                      | Mutagenesis of <i>nblA</i> to generate Comp-63                          |
| 330           | CCTAAAAGAGAACGCGTAAAGGTTATGTCTG                                      |                                                                         |
| 331           | CCTTTACGCCCTTGCTTTTAGGAGTCTG                                         | Mutagenesis of <i>nblA</i> to generate Comp-66                          |
| 332           | GACAAAGGCGTAAAGGTTATGTCTCGG                                          |                                                                         |
| 343           | GTTTTCCATGGTCGTGACACAAGATAAGGCC                                      | PCR of <i>ntcA</i> for cloning in pET28a                                |
| 344           | GTTTTCTCGAGAGTGAACGTCTGCTGAGAG                                       |                                                                         |
| 358           | GTTTTCATATGAACCAACCAATCGAATTGTCATTAG                                 | PCR of <i>nblA</i> for cloning in pET28a                                |
| 359           | GTTTTCTCGAGCTATGCCGAGTGGAACCAGAATC                                   |                                                                         |
| 569           | GTTTTGAATTCT <b>TAATACGACTCACTATAGGGAAGAAAAG</b><br>TTGCCCGTTGC      | PCR of template for <i>in vitro</i> transcription of NsrR1              |
| 570           | GTTTTGGATCCTTTAAAAAAGACCAGCTTCCCAC                                   |                                                                         |
| 571           | GTTTTGAATTCT <b>TAATACGACTCACTATAGGGACAGAGGA</b><br>ATAATCAACAATATGG | PCR of template for <i>in vitro</i> transcription of <i>nblA</i> 5'-UTR |
| 572           | GTTTTGGATCCGGTGGCAAATGAGCGAATG                                       |                                                                         |

Sequences are given in 5'→3' direction; 5'P denotes a 5' monophosphate. Underlined, restriction sites used for cloning. In red nucleotide changes with respect to the native wild type sequence. The T7 promoter sequence in oligonucleotides 569 and 571 is in bold.

**Table S3. Plasmids**

| Name      | Description                                                                                                                                                                                                                  | Reference                    |
|-----------|------------------------------------------------------------------------------------------------------------------------------------------------------------------------------------------------------------------------------|------------------------------|
| pET28a(+) | Km <sup>R</sup> , Vector for his-tagged protein expression                                                                                                                                                                   | Novagen                      |
| pSpark    | Ap <sup>R</sup> , Vector for cloning PCR products                                                                                                                                                                            | Canvax Biotech               |
| pCSRO     | Sm <sup>R</sup> Sp <sup>R</sup> , <i>sacB</i> -containing vector for conjugation of <i>Nostoc</i>                                                                                                                            | (Merino-Puerto et al., 2010) |
| pXG0      | Cm <sup>R</sup> , control plasmid without GFP                                                                                                                                                                                | (Urban and Vogel, 2007)      |
| pXG10-SF  | Cm <sup>R</sup> , vector for the generation of sfGFP fusions                                                                                                                                                                 | (Corcoran et al., 2012)      |
| pZE12-luc | Ap <sup>R</sup> , plasmid for cloning sRNAs                                                                                                                                                                                  | (Lutz and Bujard, 1997)      |
| pAVN1     | Ap <sup>R</sup> , PCR fragment generated with primers 197 and 198, containing <i>nsrR1</i> , digested with XbaI and cloned in the vector backbone generated by PCR of pZE12-luc with primers 189 (PLlacOB) and 190 (PLlacOD) | This work                    |
| pIAE11    | Cm <sup>R</sup> , PCR fragment generated with primers 253 and 254, containing <i>nblA</i> 5'-UTR+60 bp, digested with NsiI and NheI, and cloned in pXG10-SF digested with the same enzymes                                   | This work                    |
| pIAE17    | ClaI-XhoI fragment from pSAM329 cloned into pSAM221                                                                                                                                                                          | This work                    |
| pIAE26    | Ap <sup>R</sup> , same as pAVN1 but with a C to G change at position 63 of <i>NsrR1</i> (mut-63)                                                                                                                             | This work                    |
| pIAE27    | Ap <sup>R</sup> , same as pAVN1 but with a C to G change at position 66 of <i>NsrR1</i> (mut-66)                                                                                                                             | This work                    |
| pIAE28    | Cm <sup>R</sup> , same as pIAE11 but with a G to C change at position 89 of the 5'-UTR (Comp-63)                                                                                                                             | This work                    |
| pIAE29    | Cm <sup>R</sup> , same as pIAE11 but with a G to C change at position 86 of the 5'-UTR (Comp-66)                                                                                                                             | This work                    |
| pIAE32    | Km <sup>R</sup> , PCR fragment generated with primers 358 and 359, containing the <i>nblA</i> gene from <i>Nostoc</i> , digested with NdeI and XhoI and cloned in pET28a(+) digested with the same enzymes                   | This work                    |
| pSAM221   | Sm <sup>R</sup> Sp <sup>R</sup> , derivative of pSAM200 (Ionescu et al., 2010), a replicative vector for <i>Nostoc</i> . Contains a polylinker with unique ClaI and XhoI sites inserted at the unique EcoRI site of pSAM200. | This work                    |
| pSAM319   | Ap <sup>R</sup> , pSpark derivative containing a fragment of the <i>NsrR1</i> locus with the <i>NsrR1</i> gene deleted                                                                                                       | This work                    |
| pSAM325   | Sm <sup>R</sup> Sp <sup>R</sup> , pCSRO derivative containing a BamHI fragment from pSAM319 corresponding to the <i>NsrR1</i> region with the <i>NsrR1</i> gene deleted                                                      | This work                    |
| pSAM329   | Ap <sup>R</sup> , pSpark derivative with <i>NsrR1</i> under control of the <i>petE</i> promoter                                                                                                                              | This work                    |
| pSAM334   | Km <sup>R</sup> , PCR fragment generated with primers 343 and 344, containing the <i>ntcA</i> gene from <i>Nostoc</i> digested with NcoI and XhoI and cloned in pET28a(+) digested with the same enzymes                     | This work                    |

**Table S4. Sequences of inserts in the *nblA-sfgfp* fusion plasmids.**

| Plasmid | Sequence                                                                                                                                                                                            | Description         |
|---------|-----------------------------------------------------------------------------------------------------------------------------------------------------------------------------------------------------|---------------------|
| pIAE11  | atgcATACAGAGGAATAATCAACAATATGGGGCAGGTACTAAC<br>TAAAGTCCTATGCCTGTGGGGCTTCTGTAAACCGACATAACCTT<br>TACGCGTTGTCTTTTAGGAGTCTGTTATGAACCAACCAATCGA<br>ATTGTCATTAGAACACAATTCAGCATTTCGCTCATTTGCCACC<br>gctagc | <i>nblA</i> WT      |
| pIAE28  | atgcATACAGAGGAATAATCAACAATATGGGGCAGGTACTAAC<br>TAAAGTCCTATGCCTGTGGGGCTTCTGTAAACCGACATAACCTT<br>TACGCGTTCTCTTTTAGGAGTCTGTTATGAACCAACCAATCGA<br>ATTGTCATTAGAACACAATTCAGCATTTCGCTCATTTGCCACC<br>gctagc | <i>nblA</i> Comp-63 |
| pIAE29  | atgcATACAGAGGAATAATCAACAATATGGGGCAGGTACTAAC<br>TAAAGTCCTATGCCTGTGGGGCTTCTGTAAACCGACATAACCTT<br>TACGCTTGTCTTTTAGGAGTCTGTTATGAACCAACCAATCGA<br>ATTGTCATTAGAACACAATTCAGCATTTCGCTCATTTGCCACC<br>gctagc  | <i>nblA</i> Comp-66 |

*Nostoc* gene sequences are capitalized, in which black letters correspond to 5'UTR parts and green letters to ORF parts, respectively. NsiI and NheI sites that were used for cloning are highlighted in magenta and yellow, respectively. In red nucleotide changes with respect to the native wild type sequence.

**Table S5. Sequences of inserts in plasmids containing NsrR1 used for verification in *E. coli*.**

| Plasmid | Sequence                                                                                                                                                                          | Description  |
|---------|-----------------------------------------------------------------------------------------------------------------------------------------------------------------------------------|--------------|
| pAVN1   | AAGAAAAGTTGCCCCGTTGCATTTTGGGAATACGCAGCCGGG<br>TTTTAACTCTATATGAGAAGACAACGCTAAAAGAATCAACT<br>AGACCAGCTGTGGGAAGCTGGTCTTTTTTTCCGTACATACA<br>CGTTTGACCAATAGTCGTTTTACGTGGTGTCTCTGTCTAGA | NsrR1 WT     |
| pIAE26  | AAGAAAAGTTGCCCCGTTGCATTTTGGGAATACGCAGCCGGG<br>TTTTAACTCTATATGAGAAGAAGACGCTAAAAGAATCAACT<br>AGACCAGCTGTGGGAAGCTGGTCTTTTTTTCCGTACATACA<br>CGTTTGACCAATAGTCGTTTTACGTGGTGTCTCTGTCTAGA | NsrR1 Mut-63 |
| pIAE27  | AAGAAAAGTTGCCCCGTTGCATTTTGGGAATACGCAGCCGGG<br>TTTTAACTCTATATGAGAAGACAAGCTAAAAGAATCAACT<br>AGACCAGCTGTGGGAAGCTGGTCTTTTTTTCCGTACATACA<br>CGTTTGACCAATAGTCGTTTTACGTGGTGTCTCTGTCTAGA  | NsrR1 Mut-66 |

Grey shadowed letters indicate the *nsrR1* sequence. Modified nucleotides are marked in red. XbaI restriction site used for cloning is highlighted in blue.

**Table S6. Sequences of templates used for *in vitro* transcription.**

| Template            | Sequence                                                                                                                                                                                           |
|---------------------|----------------------------------------------------------------------------------------------------------------------------------------------------------------------------------------------------|
| <i>nblA</i> Comp-63 | <b>GGG</b> ACAGAGGAATAATCAACAATATGGGGCAGGTACTAAAGTCCTATGCCTGTGGGG<br>CTTCTGTAACCGACATAACCTTTACGCGTTCTCTTTTAGGAGTCTGTTATGAACCAACCAA<br>TCGAATTGTCATTAGAACAACAATTCAGCATTCGCTCATTGGCCACCgga <b>tc</b> |
| <i>nblA</i> WT      | <b>GGG</b> ACAGAGGAATAATCAACAATATGGGGCAGGTACTAAAGTCCTATGCCTGTGGGG<br>CTTCTGTAACCGACATAACCTTTACGCGTTGTCTTTTAGGAGTCTGTTATGAACCAACCAA<br>TCGAATTGTCATTAGAACAACAATTCAGCATTCGCTCATTGGCCACCgga <b>tc</b> |
| NsrR1 Mut-63        | <b>GGG</b> AAGAAAAGTTGCCCGTTGCATTTTGGGAATACGCAGCCGGGTTTTAACTCTATATGAG<br>AAGA <b>AG</b> ACGCTAAAAGAATCAACTAGACCAGCTGTGGGAAGCTGGTCTTTTTTTT                                                          |
| NsrR1 WT            | <b>GGG</b> AAGAAAAGTTGCCCGTTGCATTTTGGGAATACGCAGCCGGGTTTTAACTCTATATGAG<br>AAGACAACGCTAAAAGAATCAACTAGACCAGCTGTGGGAAGCTGGTCTTTTTTTT                                                                   |

In bold, non-encoded Gs added for efficient *in vitro* transcription. The nucleotides changed in Mut-63 and Comp-63 are in red. The initiation codon of *nblA* is underlined.

### Supplementary references

- Corcoran, C.P., Podkaminski, D., Papenfort, K., Urban, J.H., Hinton, J.C., and Vogel, J. (2012). Superfolder GFP reporters validate diverse new mRNA targets of the classic porin regulator, MicF RNA. *Mol. Microbiol.* 84, 428-445. doi: 10.1111/j.1365-2958.2012.08031.x.
- Frias, J.E., Flores, E., and Herrero, A. (1994). Requirement of the regulatory protein NtcA for the expression of nitrogen assimilation and heterocyst development genes in the cyanobacterium *Anabaena* sp. PCC 7120. *Mol. Microbiol.* 14, 823-832. doi: 10.1111/j.1365-2958.1994.tb01318.x.
- Galmozzi, C.V., Saelices, L., Florencio, F.J., and Muro-Pastor, M.I. (2010). Posttranscriptional regulation of glutamine synthetase in the filamentous cyanobacterium *Anabaena* sp. PCC 7120: differential expression between vegetative cells and heterocysts. *J. Bacteriol.* 192, 4701-4711. doi: 10.1128/JB.00222-10.
- Hanahan, D. (1983). Studies on transformation of *Escherichia coli* with plasmids. *J. Mol. Biol.* 166, 557-580.
- Ionescu, D., Voss, B., Oren, A., Hess, W.R., and Muro-Pastor, A.M. (2010). Heterocyst-specific transcription of NsiR1, a non-coding RNA encoded in a tandem array of direct repeats in cyanobacteria. *J. Mol. Biol.* 398, 177-188. doi: 10.1016/j.jmb.2010.03.010.
- Lutz, R., and Bujard, H. (1997). Independent and tight regulation of transcriptional units in *Escherichia coli* via the LacR/O, the TetR/O and AraC/I1-I2 regulatory elements. *Nucleic Acids Res.* 25, 1203-1210. doi: 10.1093/nar/25.6.1203.
- Mann, M., Wright, P.R., and Backofen, R. (2017). IntaRNA 2.0: enhanced and customizable prediction of RNA-RNA interactions. *Nucleic Acids Res.* doi: 10.1093/nar/gkx279.
- Merino-Puerto, V., Mariscal, V., Mullineaux, C.W., Herrero, A., and Flores, E. (2010). Fra proteins influencing filament integrity, diazotrophy and localization of septal protein SepJ in the heterocyst-forming cyanobacterium *Anabaena* sp. *Mol. Microbiol.* 75, 1159-1170. doi: 10.1111/j.1365-2958.2009.07031.x.
- Mitschke, J., Vioque, A., Haas, F., Hess, W.R., and Muro-Pastor, A.M. (2011). Dynamics of transcriptional start site selection during nitrogen stress-induced cell differentiation in *Anabaena* sp. PCC7120. *Proc. Natl. Acad. Sci. USA* 108, 20130-20135. doi: 10.1073/pnas.1112724108.
- Muro-Pastor, A.M., Brenes-Alvarez, M., and Vioque, A. (2017). A combinatorial strategy of alternative promoter use during differentiation of a heterocystous cyanobacterium. *Environ. Microbiol. Rep.* 9, 449-458. doi: 10.1111/1758-2229.12555.

- Ramasubramanian, T.S., Wei, T.F., and Golden, J.W. (1994). Two *Anabaena* sp. strain PCC 7120 DNA-binding factors interact with vegetative cell- and heterocyst-specific genes. *J. Bacteriol.* 176, 1214-1223. doi: 10.1128/jb.176.5.1214-1223.1994.
- Urban, J.H., and Vogel, J. (2007). Translational control and target recognition by *Escherichia coli* small RNAs in vivo. *Nucleic Acids Res.* 35, 1018-1037. doi: 10.1093/nar/gkl1040.
